# Supplementary material for: One-step sintering synthesis of a robust self-supported MoSe 2 /Ni 3 Se 2 heterostructure electrode for efficient hydrogen evolution at a high current density
Source: Royal Society of Chemistry journal article supplement (doi:10.1039/d5nr02887f), 2025-01-01
Supplement: d5nr02887f1.pdf [file d5nr02887f1.pdf]

## Supporting Information

### **One-Step Sintering Synthesis of Robust Self-Supported MoSe<sub>2</sub>/Ni<sub>3</sub>Se<sub>2</sub> Heterostructure Electrode for Efficient Hydrogen Evolution at High Current Density**

Manman Cui, Yi Zhang, Bin, Zhang\*, Yang Zhao\*, Wenjing Gu, Lu Yang, Shizhong Wei, and Zhanling Zhang\*

M. Cui, Dr. B. Zhang, Dr. Y. Zhao, W. Gu, Dr. Lu Yang, Prof. S. Wei, Prof. Z. Zhang  
School of Materials Science and Engineering, Henan University of Science and  
Technology, Luoyang 471003, China

Y. Zhang

Tianjin Plannano Energy Technologies Company Ltd., 8 Gaoying Road, Tianjin  
300350, China.

E-mail of corresponding authors:

Bin Zhang: zhangbin15@tsinghua.org.cn

Yang Zhao: gloryfire@126.com

Zhanling Zhang: zzling@haust.edu.cn

## Experimental section

### *Materials*

Commercial Mo powder with average size of ~200 nm, Ni powder with average size of ~2.5  $\mu\text{m}$  and Se powder with average size of ~500 nm were used as raw materials.

### *Synthesis of self-supported electrodes*

MoSe<sub>2</sub>/Ni<sub>3</sub>Se<sub>2</sub> heterostructure self-supported electrodes were synthesized by simple one-step sintering method. First, the certain masses of Mo, Ni and Se powders were thoroughly mixed to ensure homogeneity. Then, the mixture was pressed into tablet in a tablet press machine using a custom-made mold (Fig. S1). Finally, the tablet was sintered in a tube furnace under vacuum conditions to obtain MoSe<sub>2</sub>/Ni<sub>3</sub>Se<sub>2</sub> electrode. The electrodes prepared by fixing the mass of Mo (500 mg), Ni (1500 mg) and Se (400 mg) powders with different sintering temperatures (750, 800, 850, and 900 °C) are denoted as MoSe<sub>2</sub>/Ni<sub>3</sub>Se<sub>2</sub>-X, where X represents the sintering temperature. The MoSe<sub>2</sub>/Ni<sub>3</sub>Se<sub>2</sub>-800 electrodes with different masses of Se (200 mg, 300 mg, and 500 mg) were labeled as MoSe<sub>2</sub>/Ni<sub>3</sub>Se<sub>2</sub>-800-1, MoSe<sub>2</sub>/Ni<sub>3</sub>Se<sub>2</sub>-800-2, and MoSe<sub>2</sub>/Ni<sub>3</sub>Se<sub>2</sub>-800-3. The electrodes prepared by fixing the mass of Mo (500 mg), Ni (1500 mg), Se (400 mg) powders and the sintering temperature (800 °C) with different holding times (90 and 150 min) were noted as MoSe<sub>2</sub>/Ni<sub>3</sub>Se<sub>2</sub>-800-90 and MoSe<sub>2</sub>/Ni<sub>3</sub>Se<sub>2</sub>-800-150.

The MoS<sub>2</sub>/Ni<sub>3</sub>S<sub>2</sub>-700 electrode was synthesized using the same one-step sintering process, with a sintering temperature of 700 °C and a sintering time of 2 h, using Ni (1.5g), Mo (500mg), and S (150mg) powder as raw materials.

### *Characterization*

The X-ray diffraction (XRD) of the samples were obtained on a Bruker D8 Advance diffractometer with a Cu-targeted Ka-signal emission source. The morphological features and elemental distribution were characterized using field emission scanning electron microscopy (SEM) (ZEISS Sigma 300) and transmission electron microscopy (TEM) (FEI Talos F200X G2). Raman spectroscopy (Lab RAMHR800) and X-ray photoelectron spectrometer (XPS) (Thermo Scientific K-Alpha) characterized the surface composition and electronic states.

### *Electrochemical measurement*

All electrochemical experiments were performed on a Biologic VSP electrochemical workstation using a standard three-electrode system in alkaline medium (1.0 M KOH). The prepared electrode was directly used as working electrode, graphite rod as counter electrode and Hg/HgO electrode as reference electrode. The catalytic activity of MoSe<sub>2</sub>/Ni<sub>3</sub>Se<sub>2</sub> electrode for HER was assessed using linear scanning voltammetry

(LSV) at a scan rate of  $5 \text{ mV s}^{-1}$ . CV curves were gathered at  $10\text{-}100 \text{ mV s}^{-1}$  scan rates to evaluate the capacitive currents. Then the electrochemical double layer capacitance ( $C_{dl}$ ) was calculated. The electrochemical impedance spectra (EIS) were obtained at various overpotentials including 60, 90, 120, and 150 mV, within a frequency range spanning from 1.0 MHz to 10.0 mHz, and with an amplitude set at 10 mV. For accurate measurement, all recorded potentials were subsequently calibrated to the reversible hydrogen electrode (RHE) utilizing the following equation:  $E_{RHE} = E_{Hg/HgO} + E + 0.059 pH$ . Chronoamperometric (i-t) tests were performed at different current densities of 400, 600, 800 and  $1000 \text{ mA cm}^{-2}$  for 12 h to verify stability of the  $\text{MoSe}_2/\text{Ni}_3\text{Se}_2\text{-800}$  electrode. The long-term stability was tested at current density of  $800 \text{ mA cm}^{-2}$ .

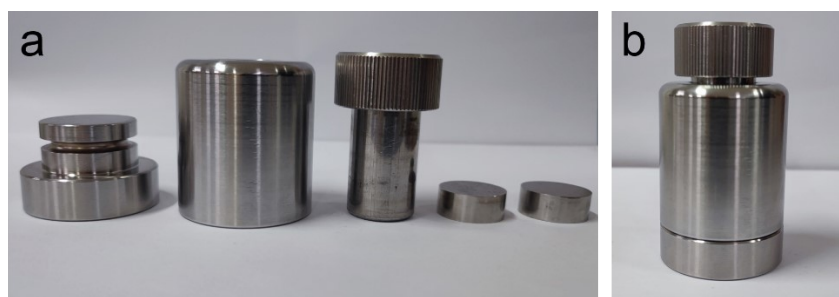

**Fig. S1.** Photos of the custom-made mold of (a) Individual parts separated and (b) combination mold.

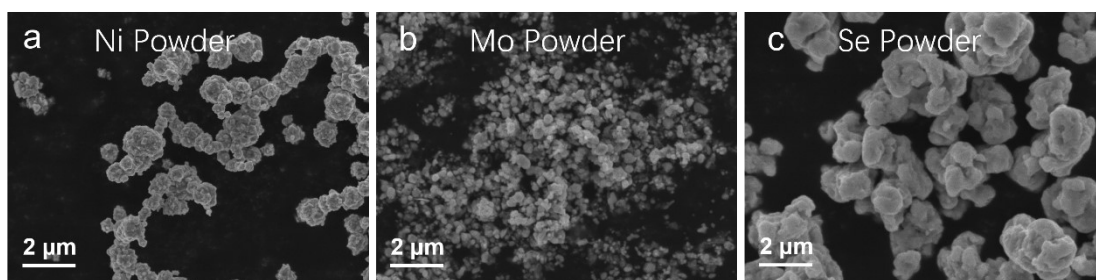

**Fig. S2.** SEM images of (a) Ni, (b) Mo, and (c) Se powder.

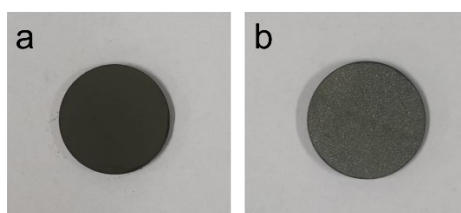

**Fig. S3.** Photos of the electrodes before and after catalyst sintering

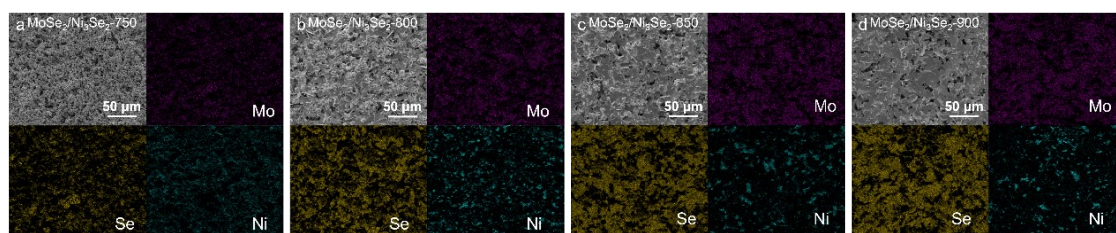

**Fig. S4.** EDS mappings of (a)  $\text{MoSe}_2/\text{Ni}_3\text{Se}_2$ -750, (b)  $\text{MoSe}_2/\text{Ni}_3\text{Se}_2$ -800, (c)  $\text{MoSe}_2/\text{Ni}_3\text{Se}_2$ -850, and (d)  $\text{MoSe}_2/\text{Ni}_3\text{Se}_2$ -900.

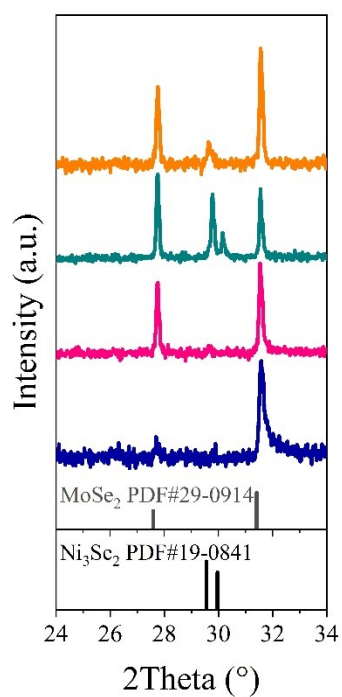

**Fig. S5.** Enlarging the light blue boxed area in Fig. 3a

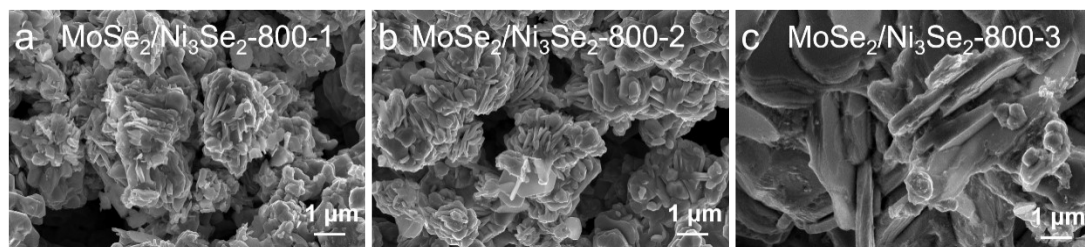

**Fig. S6.** SEM images of (a) MoSe<sub>2</sub>/Ni<sub>3</sub>Se<sub>2</sub>-800-1, (b) MoSe<sub>2</sub>/Ni<sub>3</sub>Se<sub>2</sub>-800-2, and (c) MoSe<sub>2</sub>/Ni<sub>3</sub>Se<sub>2</sub>-800-3 electrodes.

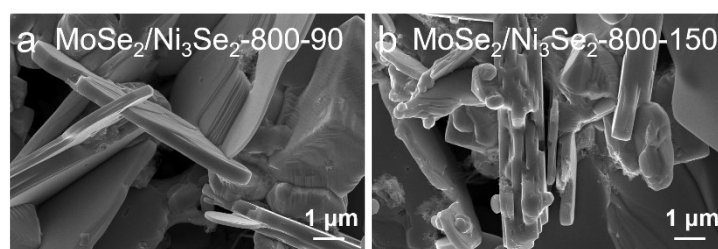

**Fig. S7.** SEM images of (a) MoSe<sub>2</sub>/Ni<sub>3</sub>Se<sub>2</sub>-800-90 and (b) MoSe<sub>2</sub>/Ni<sub>3</sub>Se<sub>2</sub>-800-150 electrodes.

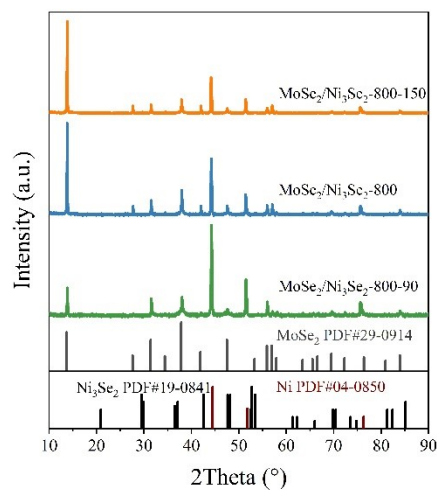

**Fig. S8.** XRD patterns of MoSe<sub>2</sub>/Ni<sub>3</sub>Se<sub>2</sub>-800-90, MoSe<sub>2</sub>/Ni<sub>3</sub>Se<sub>2</sub>-800 and MoSe<sub>2</sub>/Ni<sub>3</sub>Se<sub>2</sub>-800-150 electrodes.

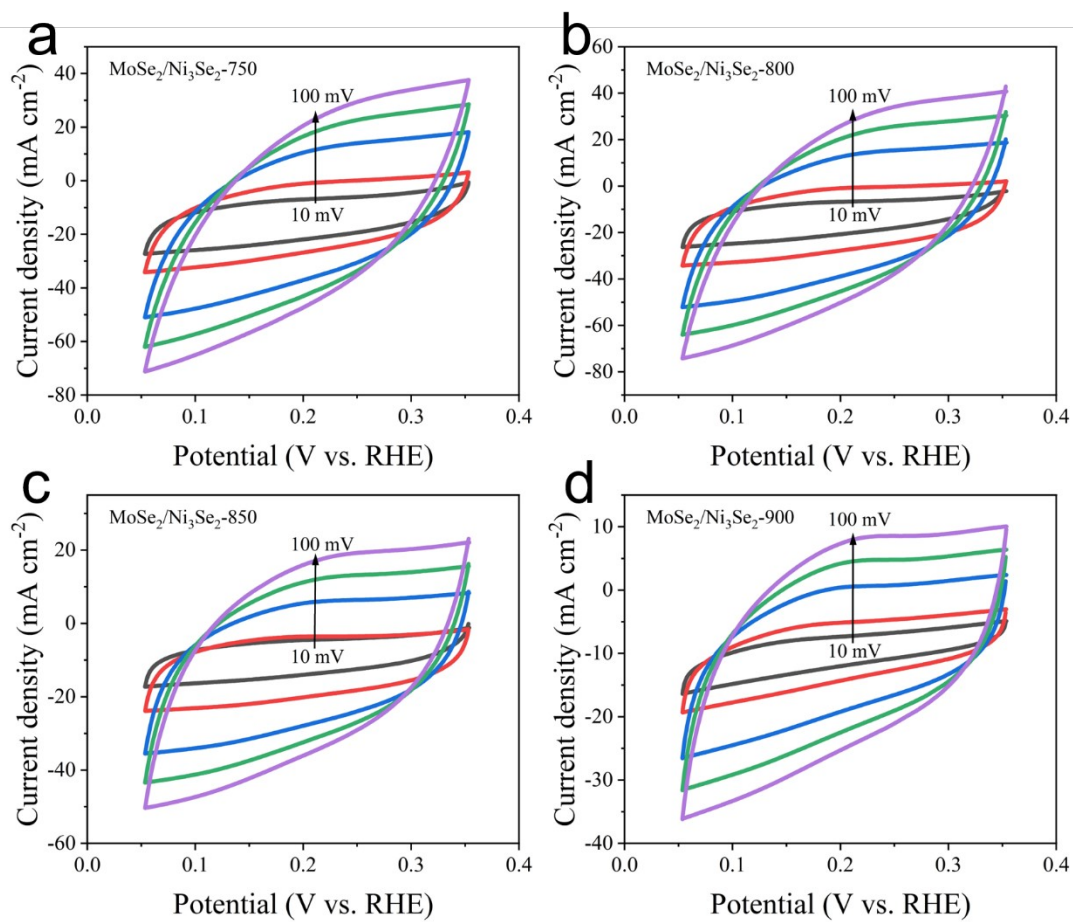

**Fig. S9.** Cyclic voltammograms (CVs) of (a) MoSe<sub>2</sub>/Ni<sub>3</sub>Se<sub>2</sub>-750, (b) MoSe<sub>2</sub>/Ni<sub>3</sub>Se<sub>2</sub>-800, (c) MoSe<sub>2</sub>/Ni<sub>3</sub>Se<sub>2</sub>-850, and (d) MoSe<sub>2</sub>/Ni<sub>3</sub>Se<sub>2</sub>-900 electrodes.

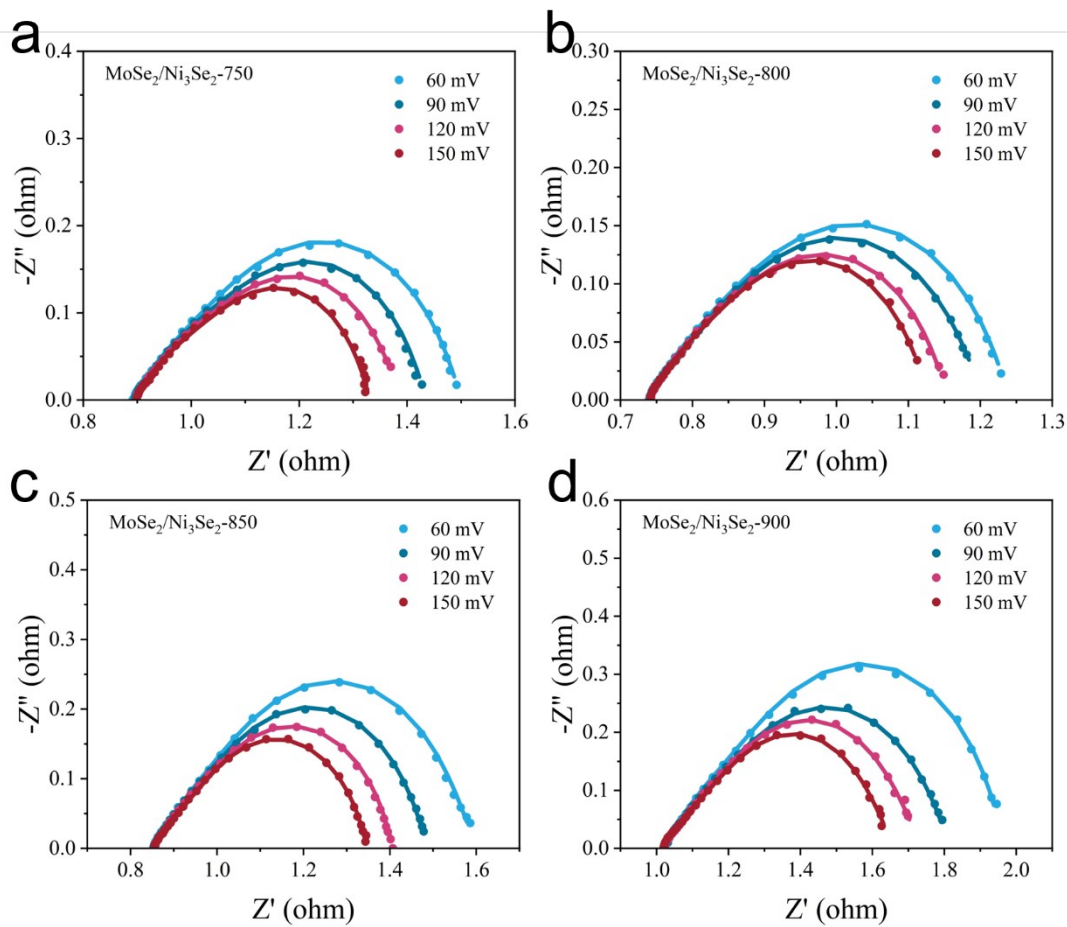

**Fig. S10.** Nyquist plots of (a)  $\text{MoSe}_2/\text{Ni}_3\text{Se}_2\text{-750}$ , (b)  $\text{MoSe}_2/\text{Ni}_3\text{Se}_2\text{-800}$ , (c)  $\text{MoSe}_2/\text{Ni}_3\text{Se}_2\text{-850}$ , and (d)  $\text{MoSe}_2/\text{Ni}_3\text{Se}_2\text{-900}$  electrodes.

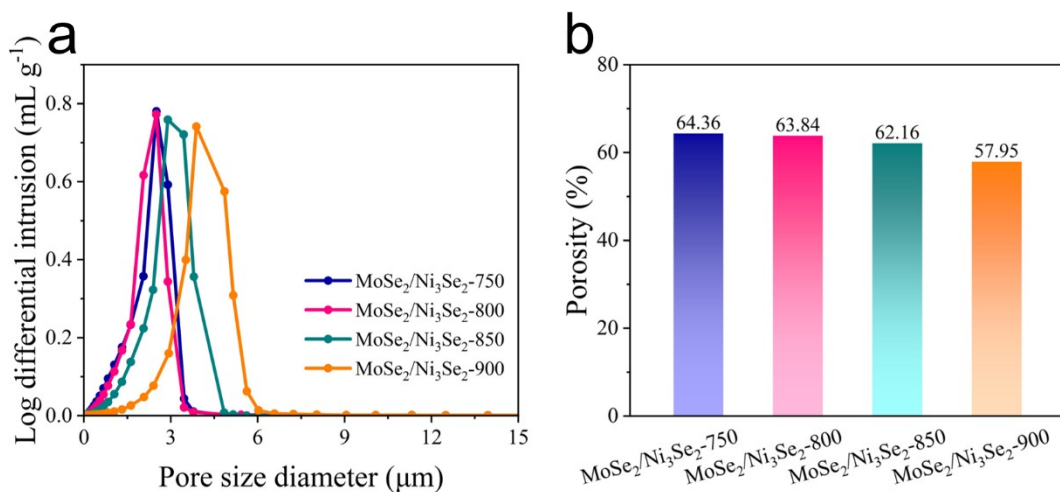

**Fig. S11.** (a) Pore size distribution and (b) Porosity of  $\text{MoSe}_2/\text{Ni}_3\text{Se}_2\text{-750}$ ,  $\text{MoSe}_2/\text{Ni}_3\text{Se}_2\text{-800}$ ,  $\text{MoSe}_2/\text{Ni}_3\text{Se}_2\text{-850}$ , and  $\text{MoSe}_2/\text{Ni}_3\text{Se}_2\text{-900}$  electrodes.



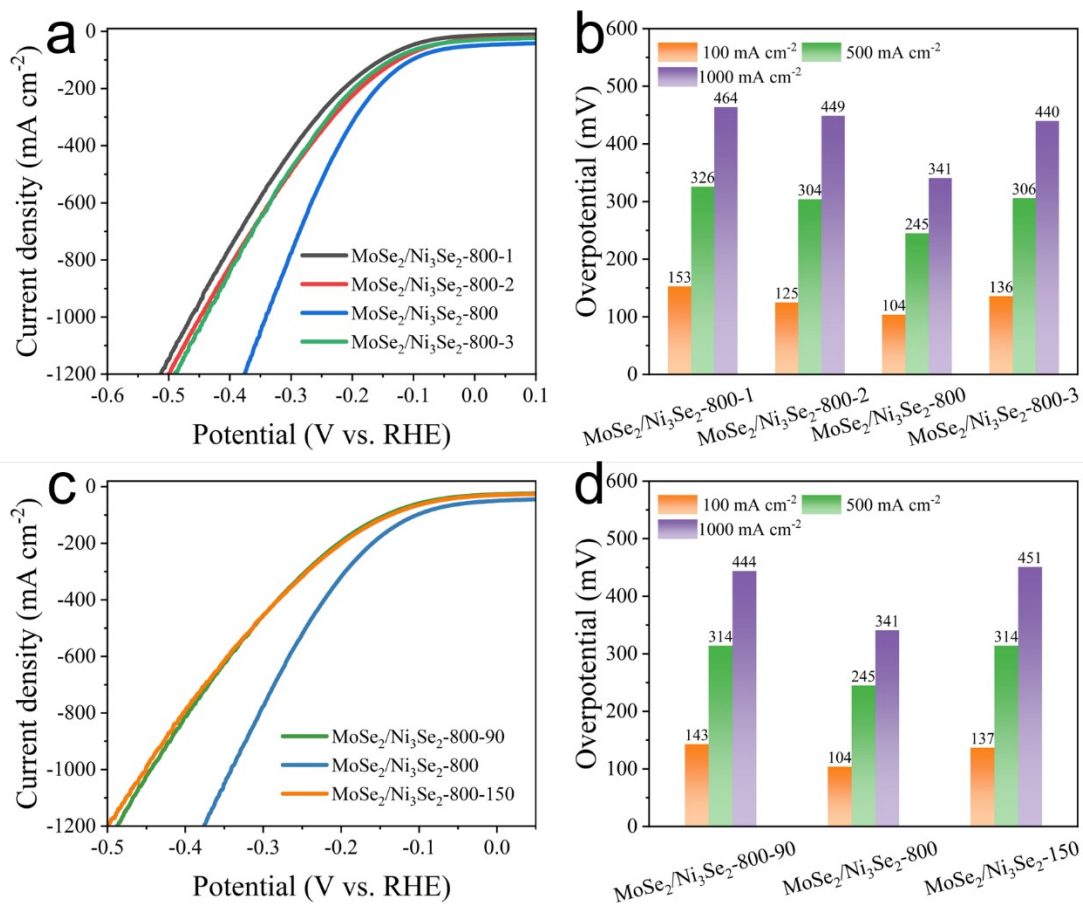

**Fig. S12.** (a) Comparison of Polarization curves of MoSe<sub>2</sub>/Ni<sub>3</sub>Se<sub>2</sub>-800-1, MoSe<sub>2</sub>/Ni<sub>3</sub>Se<sub>2</sub>-800-2, MoSe<sub>2</sub>/Ni<sub>3</sub>Se<sub>2</sub>-800, and MoSe<sub>2</sub>/Ni<sub>3</sub>Se<sub>2</sub>-800-3. (b) Comparison of overpotentials at 100 mA cm<sup>-2</sup>, 500 mA cm<sup>-2</sup>, and 1000 mA cm<sup>-2</sup> in (a). (c) Comparison of Polarization curves of MoSe<sub>2</sub>/Ni<sub>3</sub>Se<sub>2</sub>-800-90, MoSe<sub>2</sub>/Ni<sub>3</sub>Se<sub>2</sub>-800, and MoSe<sub>2</sub>/Ni<sub>3</sub>Se<sub>2</sub>-800-150. (d) Comparison of overpotentials at 100 mA cm<sup>-2</sup>, 500 mA cm<sup>-2</sup>, and 1000 mA cm<sup>-2</sup> in (c).

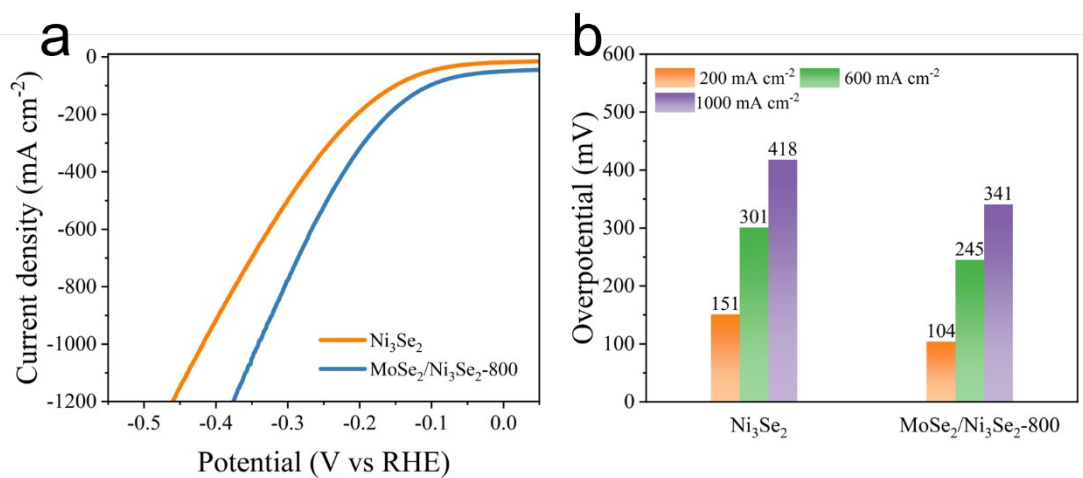

**Fig. S13.** (a) Comparison of Polarization curves of Ni<sub>3</sub>Se<sub>2</sub>-Ni600 and MoSe<sub>2</sub>/Ni<sub>3</sub>Se<sub>2</sub>-800. (b) Comparison of overpotentials at 100 mA cm<sup>-2</sup>, 500 mA cm<sup>-2</sup>, and 1000 mA cm<sup>-2</sup> in (a).



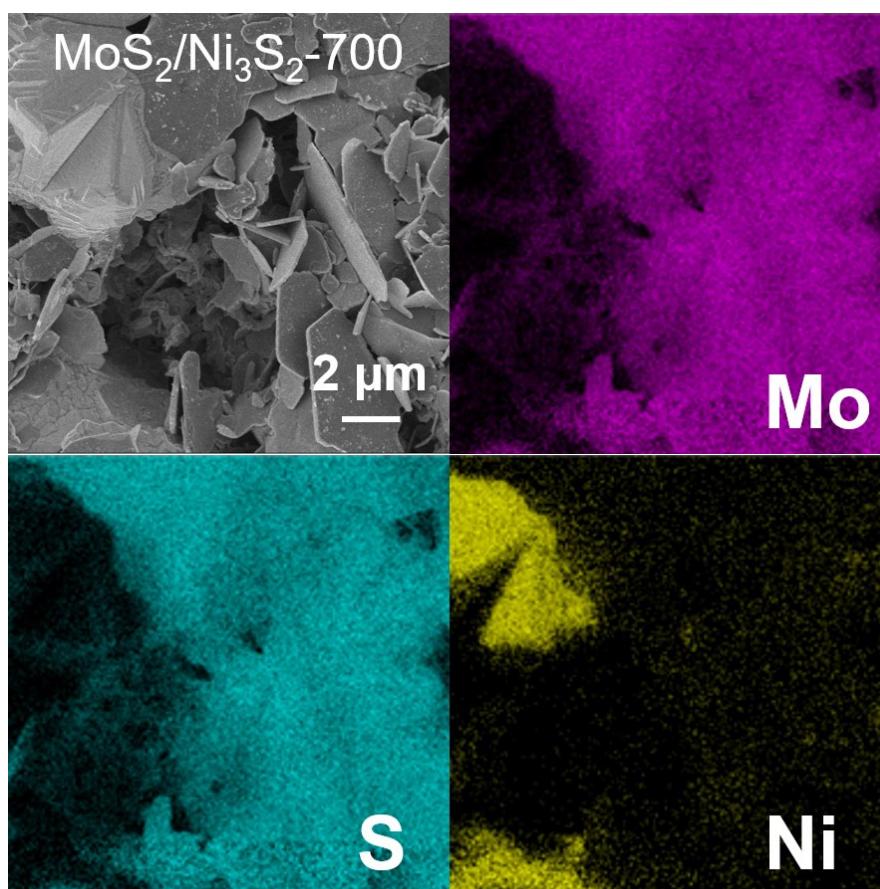

**Fig. S14.** SEM image and EDS mappings of MoS<sub>2</sub>/Ni<sub>3</sub>S<sub>2</sub>-700.

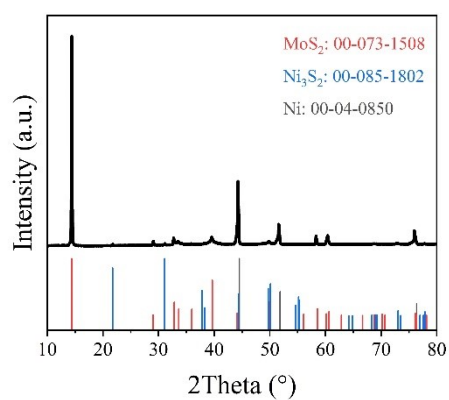

**Fig. S15.** XRD pattern of MoS<sub>2</sub>/Ni<sub>3</sub>S<sub>2</sub>-700.

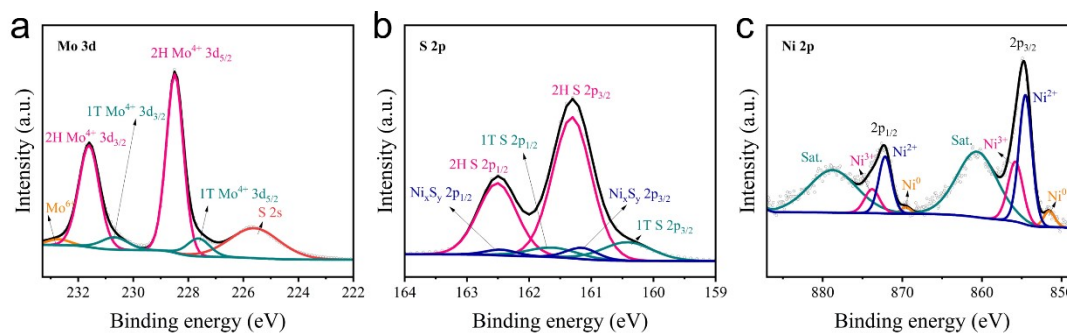

**Fig. S16.** XPS spectra of (a) Mo 3d, (b) S 2p, (c) Ni 2p of MoS<sub>2</sub>/Ni<sub>3</sub>S<sub>2</sub>-700.

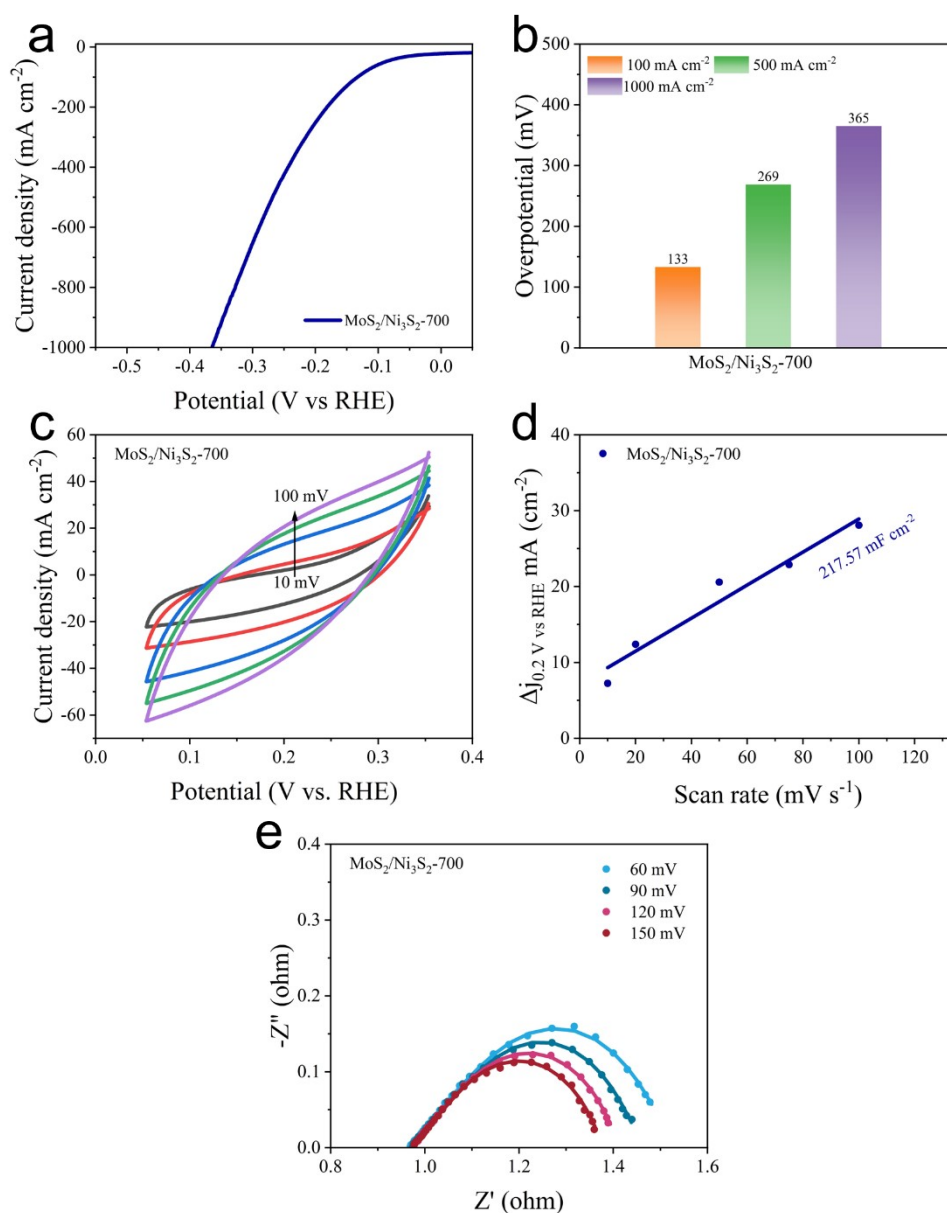

**Fig. S17.** (a) Polarization curve of MoS<sub>2</sub>/Ni<sub>3</sub>S<sub>2</sub>-700. (b) Comparison of overpotentials at 100 mA cm<sup>-2</sup>, 500 mA cm<sup>-2</sup>, and 1000 mA cm<sup>-2</sup> in (a). (c) Calculated electrochemical double-layer capacitance ( $C_{dl}$ ) of MoS<sub>2</sub>/Ni<sub>3</sub>S<sub>2</sub>-700 treated with different CV scan rates. (d) Nyquist plots of MoS<sub>2</sub>/Ni<sub>3</sub>S<sub>2</sub>-700.

**Table S1.** Simulated equivalent circuit data.

|                                                         |      |
|---------------------------------------------------------|------|
| Overpotential (mV)                                      | 90   |
| MoSe <sub>2</sub> /Ni <sub>3</sub> Se <sub>2</sub> -750 |      |
| R <sub>ct</sub> ( $\Omega$ cm <sup>-2</sup> )           | 0.26 |
| MoSe <sub>2</sub> /Ni <sub>3</sub> Se <sub>2</sub> -800 |      |
| R <sub>ct</sub> ( $\Omega$ cm <sup>-2</sup> )           | 0.24 |
| MoSe <sub>2</sub> /Ni <sub>3</sub> Se <sub>2</sub> -850 |      |
| R <sub>ct</sub> ( $\Omega$ cm <sup>-2</sup> )           | 0.35 |
| MoSe <sub>2</sub> /Ni <sub>3</sub> Se <sub>2</sub> -900 |      |
| R <sub>ct</sub> ( $\Omega$ cm <sup>-2</sup> )           | 0.41 |

**Table S2.** Comparison of the stability of our MoSe<sub>2</sub>/Ni<sub>3</sub>Se<sub>2</sub>-800 electrode with other reported electrocatalysts.

| electrocatalysts                                                   | Stability                    | Ref.      |
|--------------------------------------------------------------------|------------------------------|-----------|
| Ni-NiO-Pt                                                          | 75h@500 mA cm <sup>-2</sup>  | [1]       |
| Ni <sub>3</sub> S <sub>2</sub> /Cr <sub>2</sub> S <sub>3</sub> /NF | 50h@500 mA cm <sup>-2</sup>  | [2]       |
| Ni/MoN/rNS                                                         | 12h@640 mA cm <sup>-2</sup>  | [3]       |
| Co <sub>5.47</sub> /MoN@NF                                         | 80h@800 mA cm <sup>-2</sup>  | [4]       |
| Rh, O-MoSe <sub>2-x</sub>                                          | 100h@150 mA cm <sup>-2</sup> | [5]       |
| Ru/Mo <sub>2</sub> C/MoO <sub>2</sub>                              | 100h@500 mA cm <sup>-2</sup> | [6]       |
| Ni <sub>3</sub> Se <sub>2</sub> @Ni500                             | 190h@300 mA cm <sup>-2</sup> | [7]       |
| Ni <sub>3</sub> Se <sub>2</sub> -Ni600                             | 300h@400 mA cm <sup>-2</sup> | [8]       |
| MoSe <sub>2</sub> /Ni <sub>3</sub> Se <sub>2</sub> -800            | 200h@800 mA cm <sup>-2</sup> | This work |

## References

- [1] X. Zheng, X. Wu, R. Wan, Y. Wang, B. Chen, G. Meng, *Small* **2025**, 2411696.
- [2] D. Li, R. Wang, L. Yi, Y. Wei, J. Li, D. Zhao, W. Sun, W. Hu, *Int. J. Hydrogen Energy* **2024**, 49, 67-74.
- [3] Y. Chen, Y. Wang, J. Yu, G. Xiong, H. Niu, Y. Li, D. Sun, X. Zhang, H. Liu, W. Zhou, *Adv. Sci.* **2022**, 9, 2105869.
- [4] X. Shen, H. Li, T. Ma, Q. Jiao, Y. Zhao, H. Li, C. Feng, *Small* **2024**, 20, 2310535
- [5] Z. Luo, Y. Guo, Y. Qian, L. Zhang, Z. Song, Q. Zhang, C. He, X. Ren, *Adv. Funct. Mater.* **2024**, 34, 2405881.
- [6] L. Hou, C. Li, H. Jang, M. G. Kim, J. Z. Jiang, J. Cho, S. Liu, X. Liu, *Adv. Mater.* **2024**, 36, 2410039.
- [7] M. M. Cui, Y. Zhao, B. Zhang, Z. L. Zhang, X. Q. Shi, J. B. Lai, K. N. Shan, S. Z. Wei, H. Pang, *Int. J. Hydrogen Energy* **2024**, 76, 181-189.
- [8] Y. Zhao, M. Cui, B. Zhang, S. Wei, X. Shi, K. Shan, J. Ma, G. Zhou, H. Pang, *Small Methods* **2024**, 8, 2301465.
